# Supplementary material for: The Transcription Factor REST Is Lost in Aggressive Breast Cancer
Source: PLoS Genet. 2010 Jun 10;6(6):e1000979. doi: 10.1371/journal.pgen.1000979 (PMC2883591; doi:10.1371/journal.pgen.1000979)
Supplement: Table S2 — This table describes the gene list determined to be associated with RESTless tumors in dataset GSE5460 by class comparison. This list of genes represents all of the genes identified as more highly expressed in RESTless tumors with respect to RESTfl tumors in the GSE5460 dataset (p<e-7) by using a random variance model for univariate tests in BRB Arraytools v3.7. Of the 72 genes in this list, 63 are putative REST targets, as defined by a consensus RE1, positive ChIP Seq signal, or a two-fold change upon REST knockdown in at least one of three cell lines. (0.08 MB XLS) [file pgen.1000979.s002.xls]

## Sheet: Sheet1
Class Comparison of GSE5460 RESTless and RESTfl Tumors
Evaluation of the potential influence of REST on genes differentially expressed between RESTless and RESTfl tumors
This list of genes represents all of the genes identified as more highly expressed in RESTless tumors with respect to RESTfl tumors.
in the GSE5460 dataset (p<e-7) by using a random variance model for univariate tests in BRB Arraytools v3.7.
Of the 72 genes in this list, 63 are putative REST targets, as defined by a consensus RE1,
positive ChIP Seq signal, or a two-fold change upon REST knockdown in at least one of three cell lines.
Note: "/" denotes a nucleotide spacer of 1-8 nucleotides
Up to 4 consensus RE1, or one 16/17bp RE1 are listed up for each gene
Lowercase letters indicate mismatch with consensus RE1
Change Upon REST Knockdown' indicates fold induction in HEK-293, T47D or MCF10a Lines or some combination thereof.
Change upon REST Knockdown	Gene Symbol	RE1 Consensus	RE1-Orientation	RE1 Site	Location	ChIPSeq Ratio	Enriched in RESTless or RESTfl Tumors
>2x	CPLX2					259:3	RESTless
		Consensus	-	TTCAGAACCCCAGAGAG	Intronic
		Consensus	-	TTCAGCACCACGGAGA	Intronic
		Consensus	+	TCCAGCACC/GGACAGCTCC	Intronic
>2x	KCNK3	Consensus	+	TCCAGAGCCTGGGCGAG	Intronic		RESTless
>2x	SCG3					59:1	RESTless
		Consensus	-	TGaAGCACCTTAGACAG	Intronic
>2x	SNAP25	Consensus	+	TTCAGCACCGGGGACAG	Intronic		RESTless
>2x	OGDHL					527:3	RESTless
		Consensus	+	GCCAGCACCGTGGACAG	100bp Upstream
		Consensus	-	GCCAGAGCCCAAGCCAG	Intronic
>2x	CHGB					460:3	RESTless
		Consensus	+	GTCAGCACCGCGGACA	Intronic
-	LHFPL4	Consensus	-	ATCAGCACCATGGAGAG	Intronic		RESTless
>2x	SYP					151:6	RESTless
		Consensus	+	TCCAGCACCGTGGACA	Intronic
>2x	CECR6					121:4	RESTless
		Consensus	-	AGCAGCACCACGGACAG	Coding
>2x	SYT4	Consensus	+	TTCAGCACCTCGGACAG	Intronic		RESTless
>2x	CHGA					149:0	RESTless
		Consensus	+	TTCAGCACCGCGGACAG	Intronic
>2x	APLP1					456:1	RESTless
		Consensus	-	TTCAGCACCGCGGACAG	Intronic
>2x	SCGN					40:0	RESTless
		Consensus	+	GTCAaCACCATGGACAG	Intronic		RESTless
>2x	SCAMP5					673:5	RESTless
		Consensus	+	ACTAGCACCTCGGACAG	Intronic
-	SMPD3	Consensus	+	AGCAGAGCCTCAGACAG	15kb Upstream		RESTless
		Consensus	-	TCCAGAACCTTGGACAG	Intronic
		Consensus	+	TGCAGAGCCGGGGCCAG	Intronic
		Consensus	+	GCCAGCACC/GGCCAGGGGC	Intronic
		Consensus	-	GGCCAGGTGC/ACCAGCACC	Intronic
-	C19ORF30					4153:8	RESTless
		Consensus	+	TCCAGAACCCTGGACAG	Intronic
		Consensus	-	TGCAGAACCACGGCCAG	Intronic
		Consensus	+	TTCAGCACC/GGACAGCGCC	Intronic
		Consensus	+	TTCAGCACC/GGACAGTTCC	Intronic
>2x	PCSK1					726:1	RESTless
		Consensus	+	ATTAGAACCAGGGAGAG
		Consensus	-	GGACAGCGAC/TTCAGCACC	1kb Upstream
>2x	KCNC1					129:6	RESTless
		Consensus	-	GGCCAGGCCC/ATCAGAACC	6kb Upstream
>2x	STX1A	Consensus	+	GGCAGAGCCTTAGCCAG	Intronic		RESTless
>2x	CRMP1					120:1	RESTless
		Consensus	+	GGCAGAACC/AGAGAGTAAA	Intronic
-	FBLL1	Consensus	-	GTCAGCACCAGGGACAG	1kb Upstream		RESTless
-	NOS1AP	Consensus	-	AGACAGGACC/TCCAGAACC	Intronic		RESTless
>2x	PHF21B	Consensus	+	TTCAGCACCACGGACAG	Intronic		RESTless
		Consensus	+	GGCAGAACC/GGAGAGAACC	Intronic
		Consensus	+	ACCAGCACC/GGAGAGAGCA	Intronic
		Consensus	-	AGAGAGGTGA/GGCAGAACC	Intronic
-	CAMPK2B	Consensus	+	GCCAGCACC/GGCCAGGAGC	20kb Upstream		RESTless
		Consensus	+	ATCAGAACC/GGAGAGTGTC	Intronic
		Consensus	+	ACCAGAGCCAAAGCCAG	3kb Upstream
		Consensus	-	GCCAGAGCCAGAGCCAG	Intronic
>2x	TMEM145	Consensus	-	ACCAGAACCCAGGCCAG	12kb Upstream		RESTless
		Consensus	+	GGCAGAGCCAGAGCCAG	6kb Downstream
		Consensus	+	GCCAGAGCCAGAGCCAG	6kb Downstream
>2x	TMEM198	Consensus	+	ATCAGCACC/GGACAGAGCC	12kb Upstream		RESTless
		Consensus	+	GGCAGCACC/GGACAGTGTC	12kb Downstream
-	INSM1	Consensus	+	TGCAGAACCGTGGCCAG	24kb Upstream		RESTless
			-	GTCAGAGCCAGGGCCAG	32kb Downstream
-	KCNC2					64:1	RESTless
		Consensus	-	AGACAGCATA/AGCAGCACC	Intronic
-	LRRN2	Consensus	-	TCCAGAGCCCTGGAGA	Intronic		RESTless
		Consensus	+	TGCAGCACC/AGAGAGAAAC	Intronic
>2x	RELL2	Consensus	+	GGCAGAGCCACAGAGAG	42kb Downstream		RESTless
>2x	GNG4	Consensus	+	TTCAGAACC/GGCCAGATTC	Intronic		RESTless
		Consensus	+	TTCAGCACC/GGACAGACGC	Intronic
>2x	UNC13A					228:3	RESTless
		Consensus	-	GGACAGCGCC/TTCAGCACC	Intronic
		Consensus	+	TTCAGCACCGTGGACAG	Intronic
-	PDE8A	Consensus	-	GGCCAGAATA/AGCAGCACC	5kb Upstream		RESTless
		Consensus	-	GGAGAGTTTA/AGCAGAACC	Intronic
>2x	SYN1					333:1	RESTless
		Consensus	+	TTCAGCACCGCGGACAG	200bp Upstream
		Consensus	-	AGCGAGGGGC/GTCAGAACC	Intronic
>2x	RIMS2	Consensus	-	ATCAGAACCCAAGCCAG	Intronic		RESTless
		Consensus	-	GCCAGAGCCTAGGAGAG	Intronic
>2x	KIAA1409	Consensus	-	TTCAGCACCGGGGACAG	Intronic		RESTless
>2x	NMNAT2	Consensus	-	GGAGAGCGCC/TTCAGCACC	Intronic		RESTless
-	RIMS4					748:3	RESTless
		Consensus	+	GTCAGCACCACGGACAG	Intronic
-	DNAJC6	Consensus	+	GCCAGCACCATGGACAG	Intronic		RESTless
-	C1ORF173	Consensus	-	GGAGAGCTTA/TGCAGAACC	Intronic		RESTless
-	CAMK2B	Consensus	+	ACCAGAGCCAAAGCCAG	3kb Upstream		RESTless
		Consensus	-	GCCAGAGCCAGAGCCAG	Intronic
		Consensus	+	ATCAGAACC/GGAGAGTGTC	Intronic
>2x	GPR158					548:3	RESTless
		Consensus	-	GGAGAGTAGC/AGCAGCACC	Intronic
>2x	NFASC	Consensus	+	TTCAGAACC/AGCCAGAGCC	Intronic		RESTless
		Consensus	-	GGAGAGCTTC/GCCAGAACC	Intronic
		Consensus	+	AGCAGCACC/AGAGAGTTCC	Intronic
		Consensus	+	GGCAGCACC/AGAGAGAGCA	Intronic
>2x	KCNH2					879:4	RESTless
		Consensus	-	TTCAGAGCCCAAGACAG	9kb Upstream
		Consensus	+	TTCAGCACCTTGGACAG	6kb Upstream
>2x	CABP7					269:2	RESTless
		Consensus	-	TTCAGCACCAGGGAGA	4kb Upstream
>2x	PTPRN2					43:0	RESTless
		Consensus	-	GCCAGCACCATGGACAG	Intronic
		Consensus	+	AGCAGCACCCAGGCCAG	Intronic
		Consensus	-	AGCAGCGCCCAAGCCAG	Intronic
		Consensus	-	GCCAGCACCCGAGCCAG	Intronic
-	MAPRE3	Consensus	+	GGCAGAACC/AGACAGCAAA	25kb Upstream		RESTless
-	NAPB	Consensus	-	AGCAGAGCCAGAGAGAG	45kb Downstream		RESTless
-	ATRNL1	Consensus	-	ACCAGCACCACGGAGAG	48kb Downstream		RESTless
-	NRXN1					25:0	RESTless
		Consensus	+	TTCAGCACC/GGAGAGGGAA	38kb Downstream
>2x	RGS7	Consensus	+	TTCAGCACCTTGGCCAG	Intronic		RESTless
>2x	CAMK2N2	Consensus	-	AGAGAGGGCA/GTCAGCACC	16KB Downstream		RESTless
-	ATG9B	Consensus	+	TCCAGAACC/GGACAGTTTC	Intronic		RESTless
		Consensus	-	GGCCAGCACC/TGCAGAACC	Intronic
>2x	STMN3					78:1	RESTless
		Consensus	+	TTCAGCACCACAGCCAG	Intronic
		Consensus	-	GCCAGCACCATGGCCAG	3'UTR
-	KCNJ3	Consensus	-	GGCCAGGATA/AGCAGCACC	45kb Upstream		RESTless
>2x	DISP2					74:2	RESTless
		Consensus	-	GCCAGCGCCAAAGCCAG	Intronic
	MGLL	Consensus	-	AGACAGCCAC/TTCAGCACC	Intronic		RESTless
>2x	BEX1					267:4	RESTless
			-	TTCAGtACCGAGGACAG	Intronic
>2x	NEFH					508:7	RESTless
		Consensus	-	TTCAGCACCGGGGACAG	Intronic
	RAB39B	Consensus	+	TCCAGAACC/AGACAGTCCA	29kb Downstream		RESTless
	FOXO6	Consensus	-	TTCAGAACCTGGGCCAG	Intronic		RESTless
		Consensus	+	TGTAGAGCCCTGGACAG	1kb Upstream
-	CADM2	16/17nt	-	TCCAaCACCTTGGAGAG	Intronic		RESTless
>2x	RUNDC3A	16/17nt	+	cCCAGCGCCTGGGAGAG	Intronic		RESTless
-	CARTPT	16/17nt	+	TTCAGAACgATGGAGAG	Intronic		RESTless
	WDR17	16/17nt	-	AGTAGAACaTAAGCCAG	Intronic		RESTless
-	CHST1	16/17nt	+	GCCAGAGCCCAAGCtAG	Intronic		RESTless
>2x	PRUNE2	16/17nt	+	ATCAGAGgCATGGCCAG	Intronic		RESTless
-	SCG5	16/17nt	-	GCCAGAGCCTGAGCCAc	Intronic		RESTless
-	NTS	16/17nt	+	TGCAGAGCCCCAaAGAG	19kb Upstream		RESTless
-	DMRTC1	16/17nt	-	TCCAGAGCCGAGGCCtG	5kb Upstream		RESTless
-	TEAD2	16/17nt	-	ACCAGAGaCCCAGAGA	Intronic		RESTless
-	LRRN3	16/17nt	+	TGCAGAACCACAGCCtG	Intronic		RESTless

## Sheet: Sheet2
	APLP1
	ATG9B
	ATRNL1
	BEX1
	C19ORF30
	C1ORF173
	CABP7
	CADM2
	CAMK2B
	CAMK2N2
	CAMPK2B
	CARTPT
	CECR6
	CHGA
	CHGB
	CHST1
	CPLX2
	CRMP1
	DISP2
	DMRTC1
	DNAJC6
	FBLL1
	FOXO6
	GNG4
	GPR158
	INSM1
	KCNC1
	KCNC2
	KCNH2
	KCNJ3
	KCNK3
	KIAA1409
	LHFPL4
	LRRN2
	LRRN3
	MAPRE3
	MGLL
	NAPB
	NEFH
	NFASC
	NMNAT2
	NOS1AP
	NRXN1
	NTS
	OGDHL
	PCSK1
	PDE8A
	PHF21B
	PRUNE2
	PTPRN2
	RAB39B
	RELL2
	RGS7
	RIMS2
	RIMS4
	RUNDC3A
	SCAMP5
	SCG3
	SCG5
	SCGN
	SMPD3
	SNAP25
	STMN3
	STX1A
	SYN1
	SYP
	SYT4
	TEAD2
	TMEM145
	TMEM198
	UNC13A
	WDR17
